# Supplementary material
Source: PubMed Central journal article supplement (PMC9545730)
Supplement: JGS-70-2246-s001.pdf [file JGS-70-2246-s001.pdf]

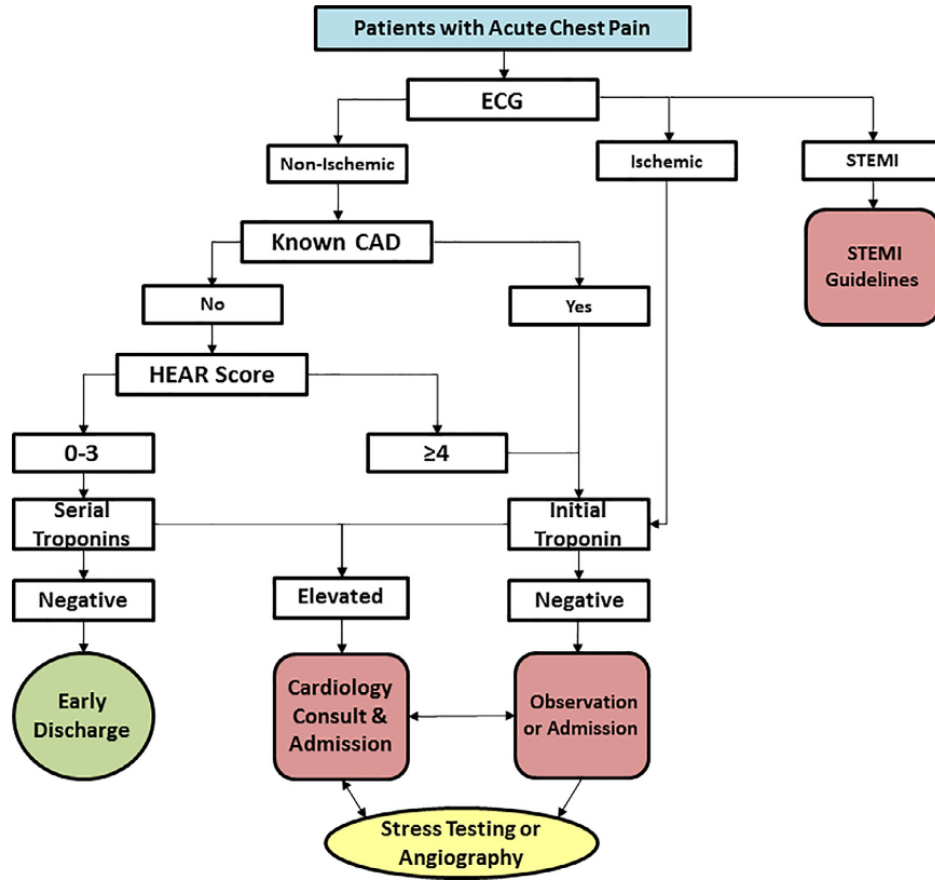

**Supplemental Figure 1.** The HEART Pathway algorithm.

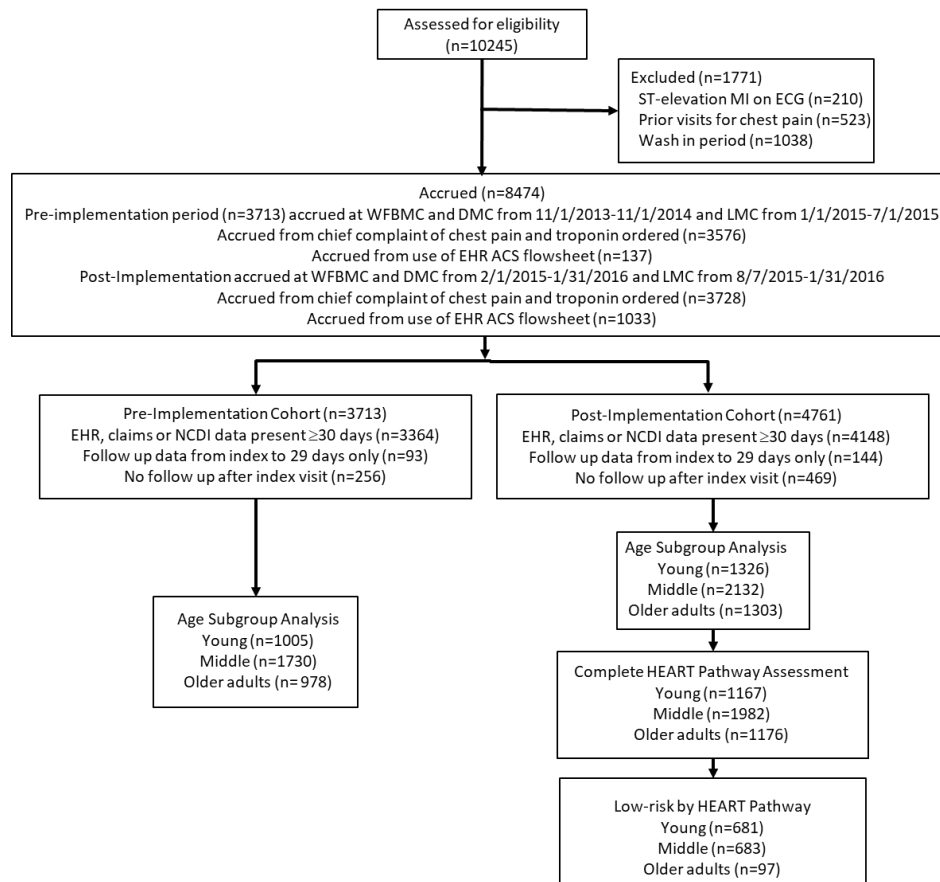

**Supplemental Figure 2.** The participant flow diagram.

**Supplemental Table 1.** Individual components of the HEART Pathway in the post-implementation cohort by age for patients with a complete HEART Pathway assessment.

| <b>HEART Pathway Components</b> | <b>Older adult (≥ 65 years)<br/>N=1176<br/>n (%)</b> | <b>Middle-aged (46-64 years)<br/>N=1982<br/>n (%)</b> | <b>Young (21-45 years)<br/>N=1167<br/>n (%)</b> | <b>p value</b> |
|---------------------------------|------------------------------------------------------|-------------------------------------------------------|-------------------------------------------------|----------------|
| Ischemic ECG                    | 93 (7.9)                                             | 124 (6.3)                                             | 56(4.8)                                         | 0.008          |
| CAD                             | 349 (29.7)                                           | 273 (13.8)                                            | 42 (3.6)                                        | <.001          |
| History                         |                                                      |                                                       |                                                 | <.001          |
| 0                               | 321 (27.3)                                           | 600 (30.3)                                            | 505 (43.3)                                      |                |
| 1                               | 240 (20.4)                                           | 636 (32.1)                                            | 388 (33.2)                                      |                |
| 2                               | 122 (10.4)                                           | 320 (16.1)                                            | 161 (13.8)                                      |                |
| ECG                             |                                                      |                                                       |                                                 | <.001          |
| 0                               | 371 (31.5)                                           | 1067 (53.8)                                           | 775 (66.4)                                      |                |
| 1                               | 309 (26.3)                                           | 488 (24.6)                                            | 279 (23.9)                                      |                |
| Age                             |                                                      |                                                       |                                                 | <.001          |
| 0                               | 1 (0.1)                                              | 5 (0.3)                                               | 1040 (89.1)                                     |                |
| 1                               | 1 (0.1)                                              | 1545 (78.0)                                           | 9 (0.8)                                         |                |
| 2                               | 647 (55.0)                                           | 2 (0.1)                                               | 2 (0.2)                                         |                |
| Risk factors                    |                                                      |                                                       |                                                 | <.001          |
| 0                               | 65 (5.5)                                             | 1427.2)                                               | 167 (14.3)                                      |                |
| 1                               | 326 (27.7)                                           | 767 (38.7)                                            | 608 (52.1)                                      |                |
| 2                               | 274 (23.3)                                           | 622(31.4)                                             | 265 (22.7)                                      |                |
| Elevated Troponin (s)           | 332 (28.2)                                           | 308 (15.5)                                            | 98 (8.4)                                        | <.001          |

ECG – electrocardiogram, CAD – coronary artery disease

**Supplemental Table 2.** Safety events at 30-days among low-risk patients by age group.

|                                  | Age (Years) | Sex    | Race  | Comorbidities                                                          | Site  | HEAR Score | Event                                                          |
|----------------------------------|-------------|--------|-------|------------------------------------------------------------------------|-------|------------|----------------------------------------------------------------|
| <b>Older adult (≥ 65 years)</b>  |             |        |       |                                                                        |       |            |                                                                |
| Patient #1                       | 73          | Male   | White | COPD                                                                   | WFBMC | 2          | Death on day 6 from subarachnoid hemorrhage                    |
| Patient #2                       | 76          | Female | Black | Hypertension, autoimmune hepatitis                                     | WFBMC | 3          | Death on day 28 while admitted for acute encephalopathy        |
| <b>Middle-aged (46-64 years)</b> |             |        |       |                                                                        |       |            |                                                                |
| Patient #1                       | 50          | Male   | Black | Hypertension, tobacco, cocaine use                                     | WFBMC | 3          | STEMI on day 12, angiography revealed 25% stenosis             |
| Patient #2                       | 57          | Female | Black | Metastatic cancer, deep vein thrombosis                                | WFBMC | 3          | Death from cancer during index hospitalization; care withdrawn |
| <b>Young (21-45 years)</b>       |             |        |       |                                                                        |       |            |                                                                |
| Patient #1                       | 41          | Female | White | Hypertension, Hyperlipidemia, Diabetes, Obesity, Family history of ACS | DMC   | 3          | Index NSTEMI requiring CABG                                    |
| Patient #2                       | 43          | Male   | White | None                                                                   | WFBMC | 0          | Death during index visit from respiratory failure              |

WFBMC – Wake Forest Baptist Medical Center, DMC – Davie Medical Center, ACS – acute coronary syndrome, CABG – coronary artery bypass graft, STEMI – ST-segment elevation myocardial infarction, COPD – chronic obstructive pulmonary disease

**Supplemental Table 3.** Absolute percentage difference in safety and effectiveness outcomes pre- vs. post-implementation by age group. MI – myocardial infarction, OCT – objective cardiac testing

| Outcome                           | Older adult (≥ 65 years)<br>% (95%CI) | Middle-aged (46-64 years)<br>% (95%CI) | Young (21-45 years)<br>% (95%CI)       |
|-----------------------------------|---------------------------------------|----------------------------------------|----------------------------------------|
| <b>SAFETY</b>                     |                                       |                                        |                                        |
| <b>Index</b>                      |                                       |                                        |                                        |
| Death                             | 0.3<br>(-0.4 to 1.0)                  | 0.1<br>(-0.2 to 0.4)                   | 0<br>(-0.2 to 0.3)                     |
| MI                                | 2.1<br>(-0.5 to 4.6)                  | 0.8<br>(-0.8 to 2.4)                   | -0.1<br>(-1.5 to 1.3)                  |
| Revascularization                 | 1.0<br>(-0.8 to 2.9)                  | -0.6<br>(-1.9 to 0.7)                  | 0.1<br>(-0.7 to 0.9)                   |
| Death + MI                        | 2.3<br>(-0.3 to 4.9)                  | 0.8<br>(-0.7 to 2.4)                   | -0.1<br>(-1.5 to 1.4)                  |
| MACE (Death + MI + Revasc)        | 2.4<br>(-0.4 to 5.1)                  | -0.1<br>(-1.8 to 1.6)                  | -0.2<br>(-1.7 to 1.3)                  |
| <b>30-day Follow-up</b>           |                                       |                                        |                                        |
| Death                             | -1.0<br>(-2.3 to 0.3)                 | -0.4<br>(-0.8 to 0.1)                  | -0.2<br>(-0.7 to 0.2)                  |
| MI                                | 0.2<br>(-0.6 to 1.0)                  | -0.1<br>(-0.6 to 0.5)                  | 0.4<br>(-0.1 to 0.9)                   |
| Revascularization                 | 0.7<br>(-0.3 to 1.6)                  | -0.2<br>(-0.9 to 0.4)                  | 0.2<br>(-0.3 to 0.7)                   |
| Death + MI                        | -0.6<br>(-2.0 to 0.9)                 | -0.4<br>(-1.1 to 0.2)                  | 0.2<br>(-0.4 to 0.8)                   |
| MACE (Death + MI + Revasc)        | -0.3<br>(-1.9 to 1.3)                 | -0.6<br>(-1.4 to 0.3)                  | 0.3<br>(-0.5 to 1.0)                   |
| <b>30-day (Index + Follow-up)</b> |                                       |                                        |                                        |
| Death                             | -0.7<br>(-2.2 to 0.7)                 | -0.3<br>(-0.8 to 0.3)                  | -0.3<br>(-0.8 to 0.3)                  |
| MI                                | 2.1<br>(-0.5 to 4.6)                  | 0.6<br>(-1.0 to 2.2)                   | -0.1<br>(-1.5 to 1.4)                  |
| Revascularization                 | 1.6<br>(-0.4 to 3.6)                  | -0.8<br>(-2.2 to 0.6)                  | 0.3<br>(-0.6 to 1.2)                   |
| Death + MI                        | 1.5<br>(-1.3 to 4.3)                  | 0.2<br>(-1.4 to 1.9)                   | -0.2<br>(-1.7 to 1.3)                  |
| MACE (Death + MI + Revasc)        | 1.8<br>(-1.1 to 4.7)                  | -0.6<br>(-2.4 to 1.1)                  | -0.3<br>(-1.9 to 1.2)                  |
| <b>EFFECTIVENESS</b>              |                                       |                                        |                                        |
| <b>Index</b>                      |                                       |                                        |                                        |
| Hospitalization                   | 2.3<br>(-1.3 to 5.9)                  | <b>-7.0</b><br><b>(-10.2 to -3.9)</b>  | <b>-11.7</b><br><b>(-15.6 to -7.8)</b> |
| OCT                               | <b>4.4</b><br><b>(0.5 to 8.4)</b>     | <b>-4.1</b><br><b>(-7.1 to -1.0)</b>   | <b>-9.3</b><br><b>(-12.5 to -6.1)</b>  |
| Early Discharge                   | -1.9<br>(-5.4 to 1.6)                 | <b>6.8</b><br><b>(3.7 to 9.9)</b>      | <b>10.5</b><br><b>(6.5 to 14.5)</b>    |
| <b>30-day (Index ± Follow-up)</b> |                                       |                                        |                                        |
| Hospitalization                   | 2.5<br>(-1.0 to 6.1)                  | <b>-7.2</b><br><b>(-10.3 to -4.1)</b>  | <b>-12.1</b><br><b>(-16.1 to -8.1)</b> |
| OCT                               | 3.6<br>(-0.4 to 7.7)                  | <b>-4.2</b><br><b>(-7.4 to -1.1)</b>   | <b>-9.7</b><br><b>(-13.1 to -6.3)</b>  |

**Supplemental Table 4.** Comparison of outcomes between age groups post-implementation at 30 days.

| <b>Outcome</b>      | <b>Older adult (≥ 65 years)</b><br>N<br>% | <b>Middle-aged (46-64 years)</b><br>N<br>% | <b>Young (21-45 years )</b><br>N<br>% | <b>Difference by Age<sup>1</sup></b><br>%<br><b>(95%CI)</b> | <b>Difference by Age<sup>2</sup></b><br>%<br><b>(95%CI)</b> |
|---------------------|-------------------------------------------|--------------------------------------------|---------------------------------------|-------------------------------------------------------------|-------------------------------------------------------------|
| Low-risk Assessment | 97/1303<br>7.4                            | 683/2132<br>32.0                           | 681/1326<br>51.4                      | <b>-44.0</b><br><b>(-47.0 to -40.8)</b>                     | <b>-24.6</b><br><b>(-27.1 to -22.1)</b>                     |
| Hospitalizations    | 1035/1303<br>79.4                         | 1235/2132<br>57.9                          | 379/1326<br>28.6                      | <b>50.9</b><br><b>(47.5 to 54.2)</b>                        | <b>21.5</b><br><b>(18.4 to 24.6)</b>                        |
| Early Discharge     | 268/1303<br>20.6                          | 860/2132<br>40.3                           | 918/1326<br>69.2                      | <b>-48.7</b><br><b>(-52.1 to -45.3)</b>                     | <b>-19.8</b><br><b>(-22.9 to -16.7)</b>                     |
| OCT                 | 487/1303<br>37.4                          | 771/2132<br>36.2                           | 204/1326<br>15.4                      | <b>22.0</b><br><b>(18.7 to 25.3)</b>                        | 1.2<br>(-2.1 to 4.6)                                        |

OCT – objective cardiac testing

**Bold font denotes findings of statistical significance**

1. Difference = Older adult – Young
2. Difference = Older adult – Middle-aged

**Supplemental Table 5.** Adjusted odds ratios comparing pre vs. post outcomes in older adults

|                                             | Older adult 65-75 years |                       |                                        | Older adult ≥ 75 years |                       |                                        | Interaction                       |
|---------------------------------------------|-------------------------|-----------------------|----------------------------------------|------------------------|-----------------------|----------------------------------------|-----------------------------------|
|                                             | Pre<br>N= 525<br>(%)    | Post<br>N= 740<br>(%) | Adjusted<br>OR                         | Pre<br>N= 453<br>(%)   | Post<br>N= 563<br>(%) | Adjusted<br>OR                         | Age X<br>Implementation<br>Cohort |
| <b><u>SAFETY</u></b>                        |                         |                       |                                        |                        |                       |                                        |                                   |
| <b>Index</b>                                |                         |                       |                                        |                        |                       |                                        |                                   |
| Death <sup>2</sup>                          | 1 (0.2)                 | 4 (0.5)               | 2.85<br>(0.32-<br>25.5)                | 3 (0.7)                | 5 (0.9)               | 1.34<br>(0.32-<br>5.65)                | 0.58                              |
| MI <sup>1</sup>                             | 42 (8.0)                | 73 (9.9)              | 1.44<br>(0.96-<br>2.16)                | 43 (9.5)               | 67<br>(11.9)          | 1.45<br>(0.95-<br>2.21)                | 0.89                              |
| Revascularization <sup>1</sup>              | 19 (3.6)                | 38 (5.1)              | 1.62<br>(0.91-<br>2.88)                | 22 (4.9)               | 30 (5.3)              | 1.33<br>(0.74-<br>2.39)                | 0.57                              |
| Death + MI <sup>1</sup>                     | 42 (8.0)                | 77<br>(10.4)          | <b>1.54</b><br><b>(1.03-<br/>2.30)</b> | 46<br>(10.2)           | 70<br>(12.4)          | 1.42<br>(0.94-<br>2.14)                | 0.21                              |
| MACE (Death + MI +<br>Revasc <sup>1</sup> ) | 48 (9.1)                | 85<br>(11.5)          | <b>1.48</b><br><b>(1.01-<br/>2.17)</b> | 52<br>(11.5)           | 79<br>(14.0)          | 1.46<br>(0.99-<br>2.16)                | 0.98                              |
| <b>30-day (Index ± Follow-<br/>up)</b>      |                         |                       |                                        |                        |                       |                                        |                                   |
| Death <sup>3</sup>                          | 11 (2.1)                | 12 (1.6)              | 0.78<br>(0.34-<br>1.79)                | 18 (4.0)               | 17 (3.0)              | 0.76<br>(0.39-<br>1.50)                | 0.98                              |
| MI <sup>1</sup>                             | 42 (8.0)                | 76<br>(10.3)          | <b>1.51</b><br><b>(1.00-<br/>2.26)</b> | 46<br>(10.2)           | 68<br>(12.1)          | 1.37<br>(0.91-<br>2.07)                | 0.80                              |
| Revascularization <sup>1</sup>              | 23 (4.4)                | 48 (6.5)              | <b>1.73</b><br><b>(1.03-<br/>2.92)</b> | 25 (5.5)               | 37 (6.6)              | 1.49<br>(0.87-<br>2.55)                | 0.59                              |
| Death + MI <sup>1</sup>                     | 51 (9.7)                | 86<br>(11.6)          | 1.39<br>(0.96-<br>2.03)                | 59<br>(13.0)           | 80<br>(14.2)          | 1.26<br>(0.86-<br>1.83)                | 0.72                              |
| MACE (Death + MI +<br>Revasc <sup>1</sup> ) | 59<br>(11.2)            | 99<br>(13.4)          | 1.39<br>(0.97-<br>1.98)                | 65<br>(14.3)           | 90<br>(16.0)          | 1.32<br>(0.92-<br>1.90)                | 0.80                              |
| <b><u>EFFECTIVENESS</u></b>                 |                         |                       |                                        |                        |                       |                                        |                                   |
| <b>Index</b>                                |                         |                       |                                        |                        |                       |                                        |                                   |
| Hospitalization <sup>4</sup>                | 395<br>(75.2)           | 551<br>(74.5)         | 0.99<br>(0.74-<br>1.32)                | 342<br>(75.5)          | 461<br>(81.9)         | <b>1.57</b><br><b>(1.12-<br/>2.21)</b> | 0.06                              |
| Objective Cardiac<br>Testing <sup>4</sup>   | 171<br>(32.6)           | 283<br>(38.2)         | <b>1.30</b><br><b>(1.01-<br/>1.68)</b> | 119<br>(26.3)          | 161<br>(28.6)         | 1.22<br>(0.91-<br>1.65)                | 0.41                              |
| Early Discharge <sup>4</sup>                | 119<br>(22.7)           | 170<br>(23.0)         | 0.97<br>(0.72-<br>1.30)                | 101<br>(22.3)          | 98<br>(17.4)          | <b>0.68</b><br><b>(0.48-<br/>0.97)</b> | 0.17                              |
| <b>30-day (Index ± Follow-<br/>up)</b>      |                         |                       |                                        |                        |                       |                                        |                                   |
| Hospitalization <sup>4</sup>                | 402<br>(76.6)           | 563<br>(76.1)         | 1.03<br>(0.77-<br>1.38)                | 350<br>(77.3)          | 472<br>(83.8)         | <b>1.63</b><br><b>(1.14-<br/>2.32)</b> | 0.06                              |

|                                        |               |               |                         |               |               |                         |      |
|----------------------------------------|---------------|---------------|-------------------------|---------------|---------------|-------------------------|------|
| Objective Cardiac Testing <sup>4</sup> | 197<br>(37.5) | 315<br>(42.6) | 1.27<br>(1.00-<br>1.64) | 133<br>(29.4) | 172<br>(30.6) | 1.16<br>(0.87-<br>1.55) | 0.37 |
|----------------------------------------|---------------|---------------|-------------------------|---------------|---------------|-------------------------|------|

1. Adjusted for sex, race, ED location and presence of chest pain
2. Index death is unadjusted due to small number of events
3. 30 day death is adjusted for sex
4. Effectiveness outcomes adjusted for sex, race, ethnicity, BMI, ED location, insurance status, smoking, history of CAD, diabetes, hyperlipidemia, hypertension, and the presence of chest pain versus other symptoms concerning for acute coronary syndrome.



**Supplementary Table 6.** HEART Pathway test characteristics with the outcome of 30-day all-cause death or MI among older adults.

| <b>Age Group</b>                    | <b>Sensitivity<br/>(95% CI)</b> | <b>Specificity<br/>(95% CI)</b> | <b>PPV<br/>(95% CI)</b> | <b>NPV<br/>(95% CI)</b> | <b>+LR<br/>(95% CI)</b> | <b>-LR<br/>(95% CI)</b> |
|-------------------------------------|---------------------------------|---------------------------------|-------------------------|-------------------------|-------------------------|-------------------------|
| <b>Older adult ≥<br/>75 years</b>   | 98.7 (96.2-100)                 | 82.7 (79.1-86.3)                | 44.6 (36.1-53.2)        | 97.7 (93.2-100)         | 4.30 (3.36-5.50)        | 0.13 (0.02-0.92)        |
| <b>Older adult 65-<br/>75 years</b> | 98.8 (96.6-100)                 | 87.4 (84.6-90.1)                | 48.6 (40.3-56.9)        | 98.2 (94.6-100)         | 6.26 (4.92-7.97)        | 0.13 (0.02-0.92)        |

PPV – positive predictive value, NPV – negative predictive value, LR – likelihood ratio
